# Supplementary material for: Suitability and Sustainability of Anti-Graffiti Treatments on Natural Stone Materials
Source: MDPI journal article supplement (doi:10.3390/su14010575), 2022-01-05
Supplement: s1 [file s1]

# **Supporting information for**

## **Suitability and Sustainability of Anti-Graffiti Treatments on Natural Stone Materials**

**Valentina Roviello <sup>1\*</sup>, Aurelio Bifulco <sup>1</sup>, Abner Colella <sup>2</sup>, Fabio Iucolano<sup>1</sup>, Domenico Caputo<sup>1</sup>, Antonio Aronne<sup>1</sup> and Barbara Liguori<sup>1</sup>**

1 Department of Chemical, Materials, and Industrial Production Engineering (DICMaPI), University of Naples Federico II, Piazzale V. Tecchio 80, 80125 Naples, Italy.

2 Department of Earth, Environment and Resources Sciences, University of Naples Federico II, Via Cintia 21, 80126 Naples, Italy.

\*Correspondence: [valentina.roviello@unina.it](mailto:valentina.roviello@unina.it); Tel.: +39 346 644 4862

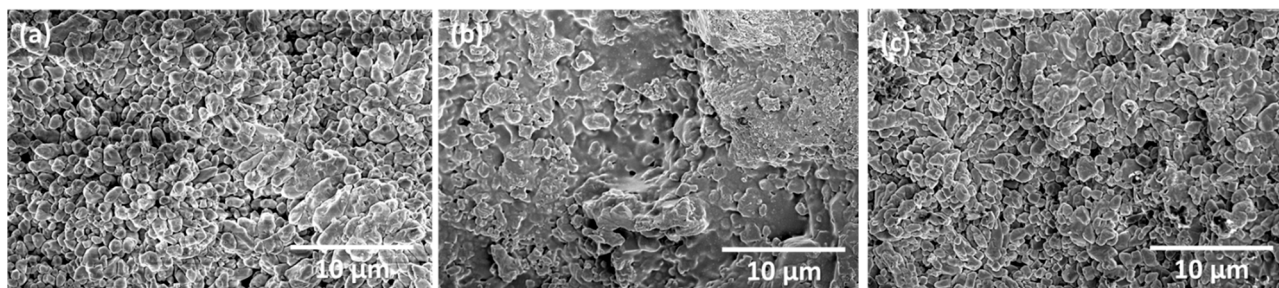

**Figure S1.** High-magnification SEM micrographs (10 μm) of untreated VS (a) compared with coatings with E (b) and NR (c) products.

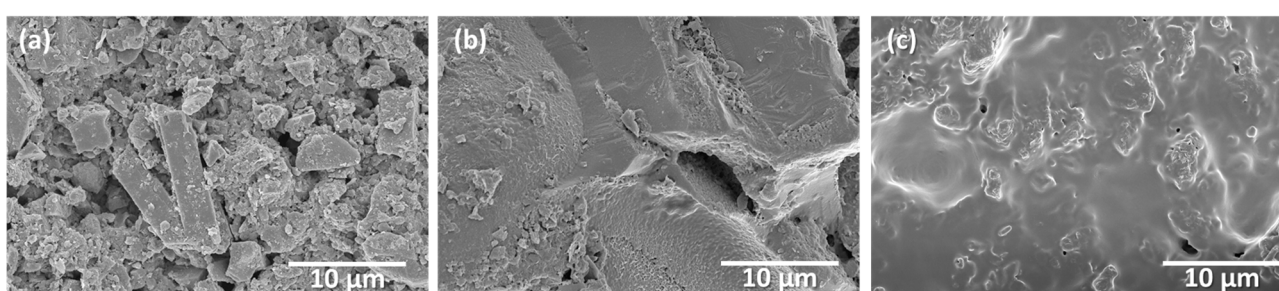

**Figure S2.** High-magnification SEM micrographs (10 μm) of untreated T (a) compared with coatings with E (b) and NR (c) products.
