# Supplementary material for: Suitability and Sustainability of Anti-Graffiti Treatments on Natural Stone Materials
Source: MDPI journal article supplement (doi:10.3390/su14010575), 2022-01-05
Supplement: s1 [file s1]

Archive with 1 entries (1 files):
- sustainability-1533918-supplementary.pdf
